# Supplementary material for: Yolk–shell-type CaO-based sorbents for CO2 capture: assessing the role of nanostructuring for the stabilization of the cyclic CO2 uptake
Source: PubMed Central journal article supplement — Nanoscale. 2022 Oct 10;14(45):16816–28. doi: 10.1039/d2nr04492g (PMC9685369; doi:10.1039/d2nr04492g), 2022-10-10
Supplement: NR-014-D2NR04492G-s001.pdf [file NR-014-D2NR04492G-s001.pdf]

## Supporting information

### *Yolk-shell-type CaO-based sorbents for CO<sub>2</sub> capture: Assessing the role of nanostructuring for the stabilization of the cyclic CO<sub>2</sub> uptake*

Maximilian Krödel<sup>[a]</sup>, Alexander Oing<sup>[a]</sup>, Jan Negele<sup>[a]</sup>, Annelies Landuyt<sup>[a]</sup>, Agnieszka Kierzkowska<sup>[a]</sup>, Alexander H. Bork<sup>[a]</sup>, Felix Donat<sup>[a]</sup>, Christoph R. Müller<sup>[a],\*</sup>

[a] Department of Mechanical and Process Engineering, Laboratory of Energy Science and Engineering, ETH Zurich, Leonhardstrasse 21, 8092, Zurich, Switzerland

\*Corresponding author: muelchri@ethz.ch

#### Table of Contents

#### **Experimental**

1.1 Details on Rietveld refinement and crystal structures used for the refinement

#### **Figures and Tables**

Figure S1: Carbon spheres derived during coating synthesis for high carbon contents.

Figure S2: Exemplary Rietveld refinement plots for Ca-26Zr (core-shell) and Ca@55Zr (yolk-shell)

Figure S3: In situ Raman spectroscopy data confirming the removal of the carbonaceous template and (EDX-)TEM analysis of Ca@C before and after template removal

Figure S4: (EDX-)TEM analysis of zirconia-stabilized yolk-shell and core-shell sorbents after the first calcination.

Figure S5: (EDX-)TEM analysis of zirconia-stabilized yolk-shell and core-shell sorbents after the 10<sup>th</sup> and 20<sup>th</sup> cycle as well as SEM micrographs after the 10<sup>th</sup> cycle.

Table S1: Phases and their respective space groups used in Rietveld refinement

#### Experimental

##### *1.1 Rietveld refinement*

Multiphase Rietveld refinements were carried out with the FullProf Suite software. The space groups of the individual phases that were used for the Rietveld refinements are listed in Table S1. Exemplary fits for Ca-22Zr and Ca@55Zr are shown in Figure S2 a and b, respectively.

Table S1: Space groups of the individual phases that were used for the Rietveld refinements.

|          |                    |                     |                   |                    |
|----------|--------------------|---------------------|-------------------|--------------------|
| CaO      | CaZrO <sub>3</sub> | Ca(OH) <sub>2</sub> | CaCO <sub>3</sub> | t-ZrO <sub>2</sub> |
| F m -3 m | P c m n            | P -3 m 1            | R -3 c            | P 42/n m c         |

## Figures

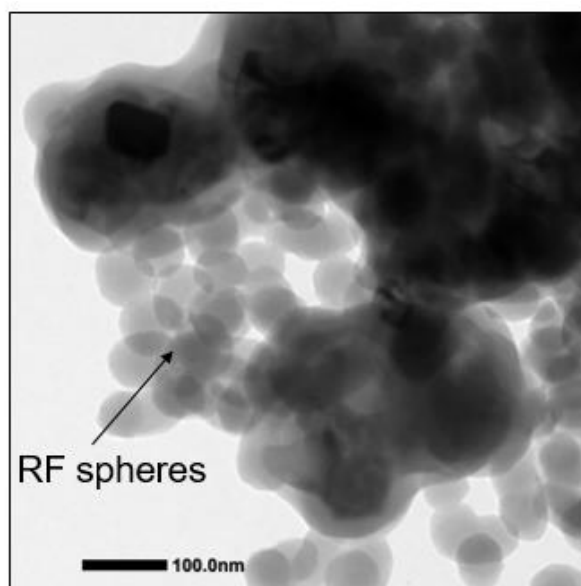

Figure S1: Resorcinol-formaldehyde polymer spheres observed for thicker template depositions at higher temperatures (here: 5 h at 35 °C).

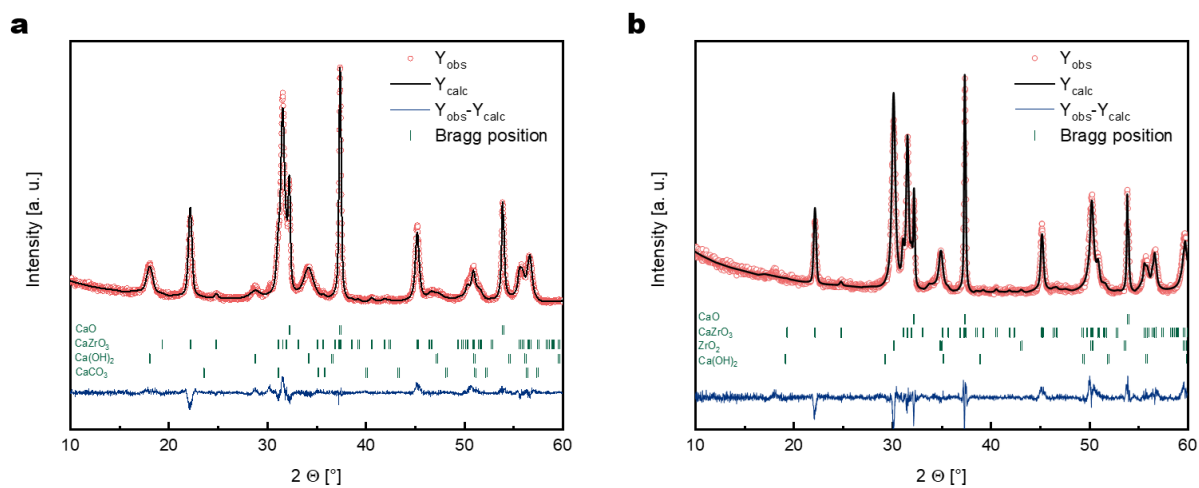

Figure S2: Exemplary Rietveld refinements for as-prepared sorbents: a) Ca-26Zr (core shell) and b) Ca@55Zr (yolk-shell).

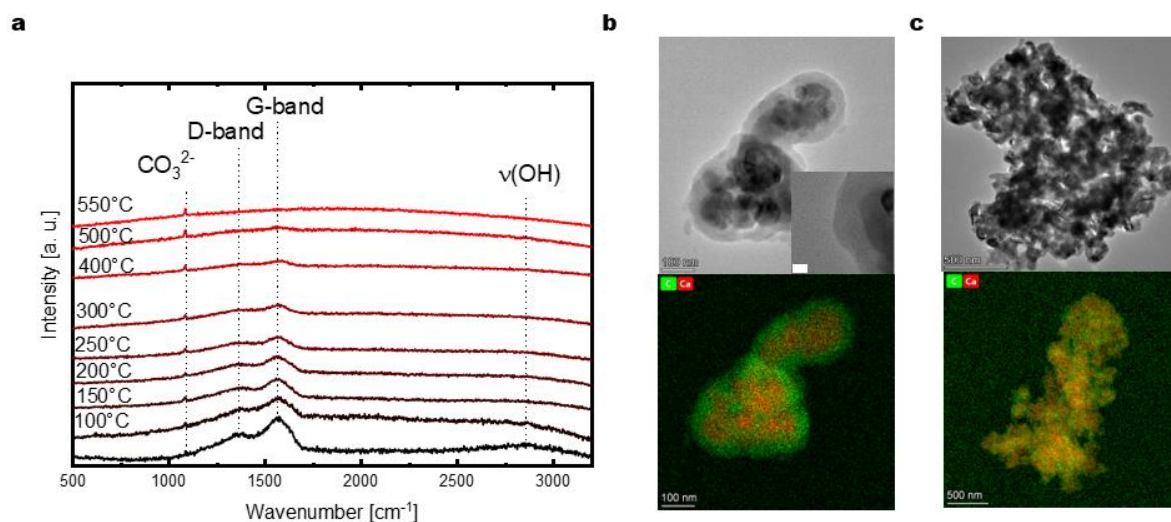

Figure S3: a) In-situ Raman spectroscopy measurements of Ca@C in air (heating ramp  $20\text{ }^{\circ}\text{C min}^{-1}$ ). The vibrational modes of OH disappear at approximately  $100\text{ }^{\circ}\text{C}$ . The D-band and G-band of carbon fully disappear at  $550\text{ }^{\circ}\text{C}$ , confirming complete carbon removal at this temperature; TEM micrograph and EDX-TEM map for Ca and C b) before removal of the carbonaceous template and c) after removal of the carbonaceous template in air at  $900\text{ }^{\circ}\text{C}$  (1 h).

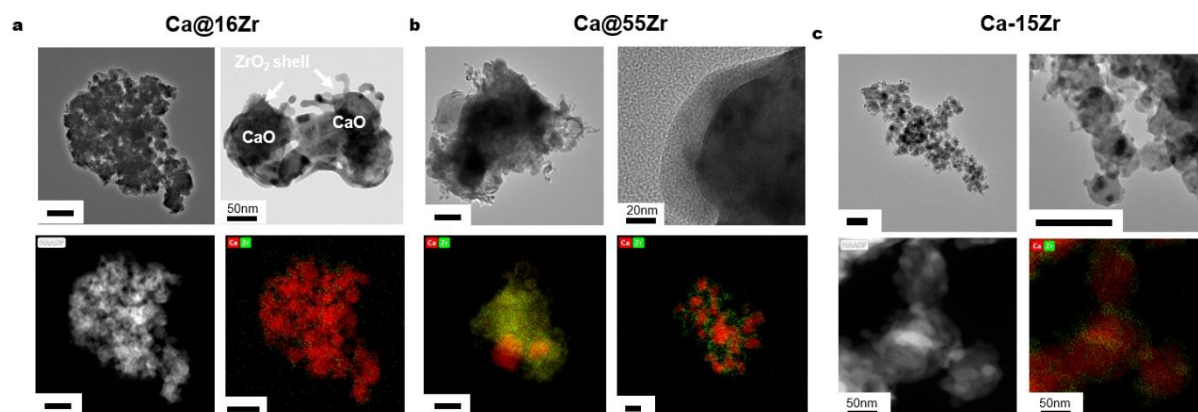

Figure S4: TEM micrographs and EDX-TEM elemental maps for Ca and Zr for zirconia-stabilized sorbents a) yolk-shell-type Ca@16Zr, b) yolk-shell-type Ca@55Zr and c) core-shell-type Ca-15Zr. The scale bars refer to 200 nm if not mentioned otherwise.

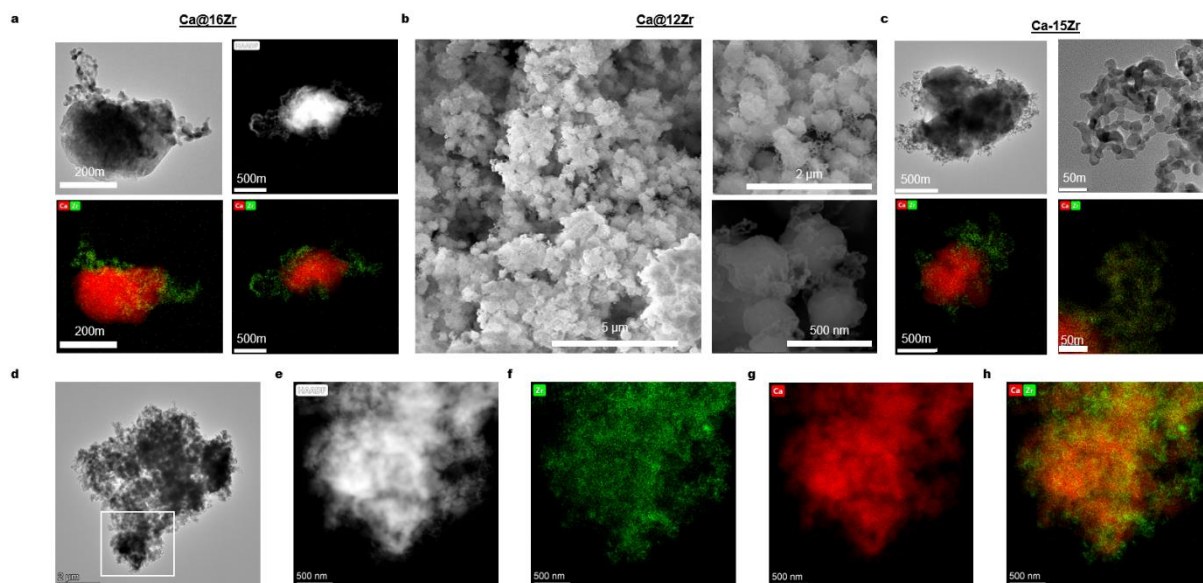

Figure S5: a) TEM micrographs and EDX-TEM elemental mapping of Ca and Zr for Ca@16Zr after 10 cycles, b) SEM micrographs of Ca@12Zr after 10 cycles showing that individual CaO nanoparticles are preserved, c) TEM micrographs and EDX-TEM elemental mapping of Ca and Zr for Ca-15Zr, d) TEM micrograph of Ca@12Zr after 20 cycles with e) – h) HAADF image and elemental mappings for Ca and Zr from EDX-TEM of the inset indicated in d).
